# Supplementary material for: Fabrication and Characterization of PCL/HA Filament as a 3D Printing Material Using Thermal Extrusion Technology for Bone Tissue Engineering
Source: MDPI journal article supplement (doi:10.3390/polym14040669), 2022-02-11
Supplement: s1 [file s1]

### Supplementary Materials:

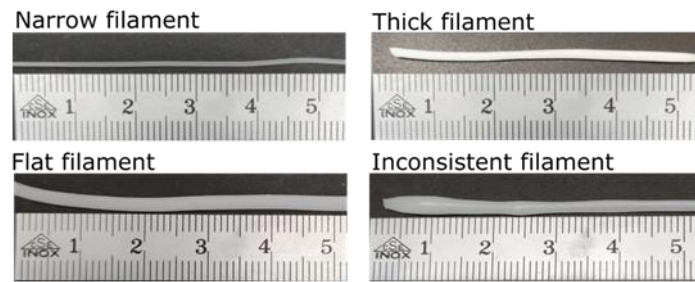

### Not suitable filaments

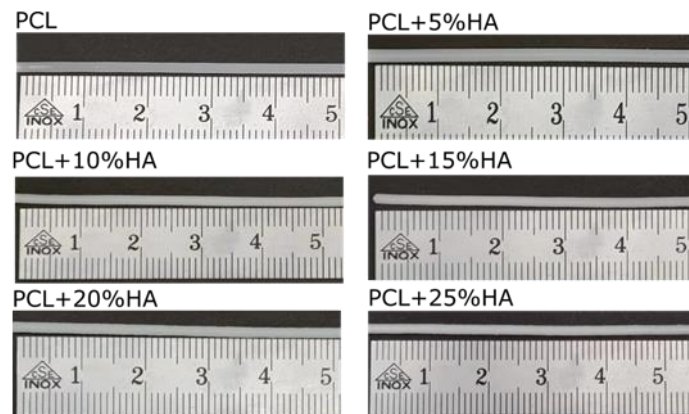

### Suitable filaments

**Figure S1:** Suitable and not suitable filaments.

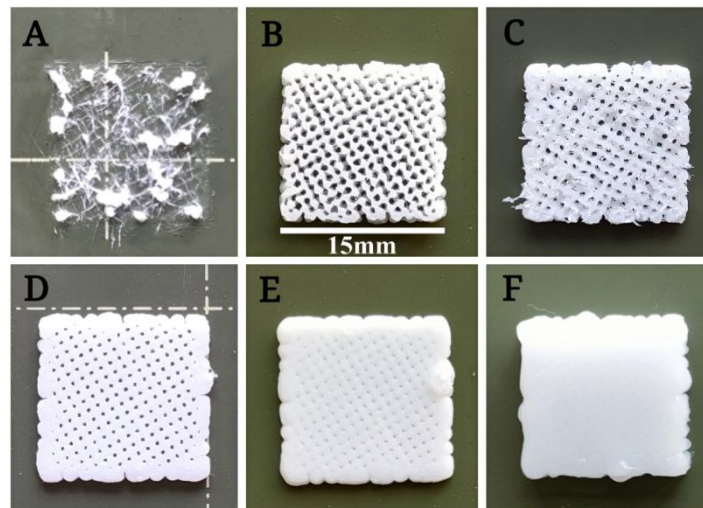

**Figure S2:** Examples of non-suitable scaffolds. (A) Little extrusion: PCL+25%HA 198–202 °C. (B) Not enough extrusion: filament interruption PCL+15%HA 182–184 °C. (C) Material sticks around the nozzle, causing midway clog: bottom layers are ok but top layers show poor filament extrusion: PCL+20%HA at 110 mm/s speed 196–198 °C. (D) Small pore size (<550 μm): PCL+15%HA 186–187 °C. (E) Small pore size due to extruded material melted close together: PCL+20%HA 199–

200 °C. (F) Extruded material melt together due to too high temperature: PCL 200°C.

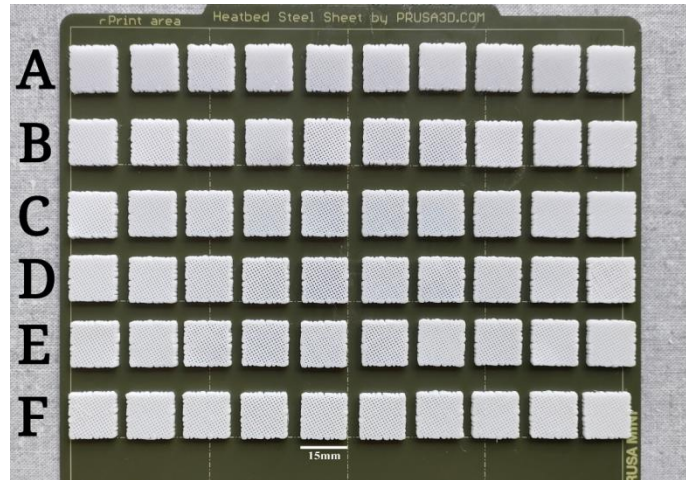

**Figure S3:** All suitable scaffolds (n = 10). (A) PCL scaffolds. (B) PCL+5%HA. (C) PCL+10%HA. (D) PCL+15%HA. (E) PCL+20%HA. (F) PCL+25%HA.

**Table S1:** Filament fabrication tested

| Groups | T4 | T3 | T2 | T1 | Extruder (RPM) & filament<br>(mm/s) speed | Filament results                  |
|--------|----|----|----|----|-------------------------------------------|-----------------------------------|
| PCL    | 66 | 66 | 66 | 66 | 5 RPM–22.7 mm/s                           | Thick diameter                    |
|        | 65 | 65 | 65 | 65 | 4.5 RPM–14.5 mm/s                         | Thick diameter                    |
|        | 64 | 64 | 64 | 64 | → .....→ 2 RPM–6.7 mm/s                   | Diameter proper but flat          |
|        | 63 | 64 | 64 | 63 | 2 RPM–6.7 mm/s                            | Diameter proper but flat          |
|        | 62 | 64 | 64 | 62 | 2 RPM–6.7 mm/s                            | Diameter proper but slightly flat |
|        | 61 | 64 | 64 | 62 | 2 RPM–6.7 mm/s                            | Diameter proper but slightly flat |
|        | 60 | 64 | 64 | 62 | 2 RPM–6.7 mm/s                            | Diameter consistent               |
| +5%HA  | 60 | 64 | 64 | 62 | 5 RPM–22.7 mm/s                           | Extrudes slowly                   |
|        | 61 | 65 | 65 | 63 | 5 RPM–22.7 mm/s                           | Extrudes slowly                   |
|        | 62 | 66 | 66 | 65 | 5 RPM–22.7 mm/s                           | Thick diameter                    |
|        | 62 | 66 | 66 | 65 | → .....→ 3RPM–11.5 mm/s                   | Inconsistent diameter             |
|        | 61 | 66 | 66 | 67 | 2.9 RPM–10.3 mm/s                         | Consistent diameter               |
| +10%HA | 62 | 66 | 66 | 67 | 5 RPM – 22.7 mm/s                         | Extruder motor limit reached      |
|        | 65 | 69 | 69 | 70 | 5 RPM – 22.7 mm/s                         | Extruder motor limit reached      |
|        | 68 | 69 | 69 | 70 | 5 RPM – 22.7 mm/s                         | Thick diameter                    |
|        | 69 | 70 | 70 | 71 | → .....→ 2.5 RPM–9.7 mm/s                 | Diameter proper but flat          |
|        | 69 | 70 | 70 | 70 | 2.5 RPM–9.7 mm/s                          | Diameter proper but flat          |
|        | 69 | 70 | 70 | 69 | 2.5 RPM–9.7 mm/s                          | Consistent diameter               |
| +15%HA | 69 | 70 | 70 | 69 | 5 RPM–22.7 mm/s                           | Thick diameter                    |
|        | 69 | 70 | 70 | 69 | → .....→ 2.5 RPM–9.7 mm/s                 | Soft and flat filament            |
|        | 68 | 69 | 69 | 68 | 2.5 RPM–9.7 mm/s                          | Soft and flat filament            |
|        | 67 | 68 | 68 | 67 | 2.5 RPM–9.7 mm/s                          | Soft and flat filament            |
|        | 67 | 67 | 67 | 66 | 2.5 RPM–9.7 mm/s                          | Diameter proper but flat          |
|        | 67 | 67 | 67 | 65 | 2.4 RPM–8.8 mm/s                          | Diameter proper but flat          |
|        | 67 | 67 | 66 | 65 | 2.4 RPM–8.8 mm/s                          | Consistent diameter               |
| +20%HA | 67 | 67 | 66 | 65 | 5 RPM–22.7 mm/s                           | Thick diameter                    |
|        | 67 | 67 | 66 | 65 | → .....→ 3RPM–11.5 mm/s                   | Slightly thick                    |
|        | 67 | 67 | 66 | 65 | 2.5 RPM–9.7 mm/s                          | Inconsistent diameter             |

|        |    |    |    |    |                          |                                   |
|--------|----|----|----|----|--------------------------|-----------------------------------|
|        | 67 | 67 | 67 | 66 | 2.5 RPM–9.7 mm/s         | Diameter proper but flat          |
|        | 67 | 67 | 67 | 65 | 2.5 RPM–9.7 mm/s         | Diameter proper but flat          |
|        | 66 | 67 | 67 | 65 | 2.5 RPM–9.7 mm/s         | Diameter proper but slightly flat |
|        | 65 | 67 | 67 | 65 | 2.5 RPM–9.7 mm/s         | Consistent diameter               |
| +25%HA | 65 | 67 | 67 | 65 | 5 RPM–22.7 mm/s          | Thick diameter                    |
|        | 65 | 67 | 67 | 66 | → ..... → 2 RPM–6.7 mm/s | Diameter proper but flat          |
|        | 65 | 67 | 67 | 66 | 2 RPM–6.7 mm/s           | Diameter proper but flat          |
|        | 61 | 66 | 67 | 66 | 2 RPM–6.7 mm/s           | Diameter consistent               |

RPM: Revolution Per Minute

**Table S2:** Scaffold printing parameters tested

| Groups | T/°C    | Success | Reason for success or failure                                                                                      |
|--------|---------|---------|--------------------------------------------------------------------------------------------------------------------|
| PCL    | 170–172 | N       | Little filament extrusion due to low temperature (A)                                                               |
|        | 173     | N       | Not enough filament extrusion due to slightly low temperature (B)                                                  |
|        | 174     | Y       | Good filament extrusion                                                                                            |
|        | 175     | N       | Small pore size (High temperature leads to high fluidity of extruded material and cannot be cooled in time) (D, E) |
| +5%HA  | 174     | N       | Not enough filament extrudes out due to slightly low temperature (B)                                               |
|        | 175     | Y       | Good filament extrusion                                                                                            |
|        | 176     | N       | Small pore size (D, E)                                                                                             |
| +10%HA | 175     | N       | Material sticks around the nozzle at 100 speed (C)                                                                 |
|        | 175     | Y       | Good filament extrusion at 110 speed                                                                               |
|        | 176     | N       | Small pore size (D, E)                                                                                             |
| +15%HA | 175–181 | N       | Little filament extrudes out (A)                                                                                   |
|        | 182–184 | N       | Not enough filament extrusion (B)                                                                                  |
|        | 185     | Y       | Good filament extrusion                                                                                            |
|        | 186–187 | N       | Small pore size (D, E)                                                                                             |
| +20%HA | 187–195 | N       | Little/Not enough filament extrusion at 100 speed (A, B)                                                           |
|        | 196–198 | N       | Material sticks around nozzle, causing midway clog at 110 speed (C)                                                |
|        | 198     | Y       | Good filament extrusion at 120 speed                                                                               |
|        | 199–200 | N       | Small pore size (D, E)                                                                                             |
| +25%HA | 198–202 | N       | Little filament extrusion at 120 speed (A)                                                                         |
|        | 203–205 | N       | Not enough filament extrusion at 120 speed (B)                                                                     |
|        | 205     | Y       | Good filament extrusion at 110 speed                                                                               |
|        | 206     | N       | Small pore size (D, E)                                                                                             |

Y: Yes; N: No. Speed: mm/s. (A, B, C, D, E): Reference to Supplementary Figure S2
